# Supplementary material
Source: publisher figshare collection journal article supplement (https://frontiersin.figshare.com/ndownloader/files/26433584)
Supplement: Supplementary file [file 26433584]

## Supplementary Material

### 1 Supplementary Figures

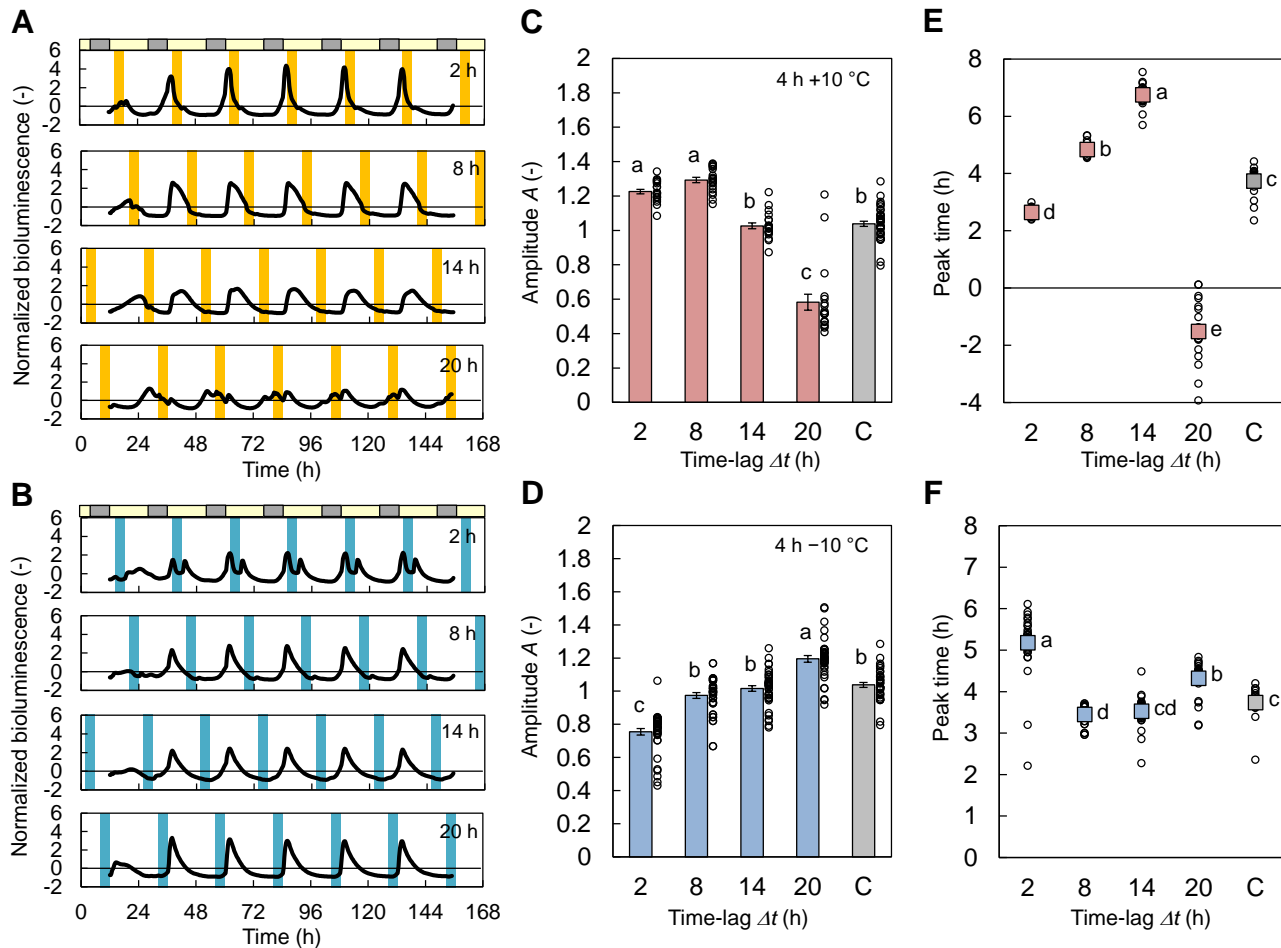

**Figure S1.** Effects of the time lag on *CCAI* rhythms under conditions of light-dark (L/D) = 16/8 h and 4 h  $\pm 10^{\circ}\text{C}$  cycles with anti-phase initial conditions. **(A, B)** Normalized bioluminescence of *CCAI::LUC* under  $+10^{\circ}\text{C}$  **(A)** and  $-10^{\circ}\text{C}$  **(B)** conditions. **(C, D)** Amplitude  $A$  of the bioluminescence oscillation under  $+10^{\circ}\text{C}$  **(C)** and  $-10^{\circ}\text{C}$  **(D)** conditions (mean  $\pm$  SEM,  $n = 20$  individuals in  $+10^{\circ}\text{C}$ , 40 in  $-10^{\circ}\text{C}$ , and 40 in the control). The control is labelled C. The circles indicate the individual data points. Different letters indicate significant differences for each panel (Tukey-Kramer test,  $p < 0.05$ ). **(E, F)** Peak time under  $+10^{\circ}\text{C}$  **(E)** and  $-10^{\circ}\text{C}$  **(F)** conditions (circular mean,  $n = 20$  individuals in  $+10^{\circ}\text{C}$ , 40 in  $-10^{\circ}\text{C}$ , and 40 in the control). The circles indicate the individual data points. Different letters indicate significant differences for each panel (Watson-Williams test with Bonferroni correction,  $p < 0.05$ ).

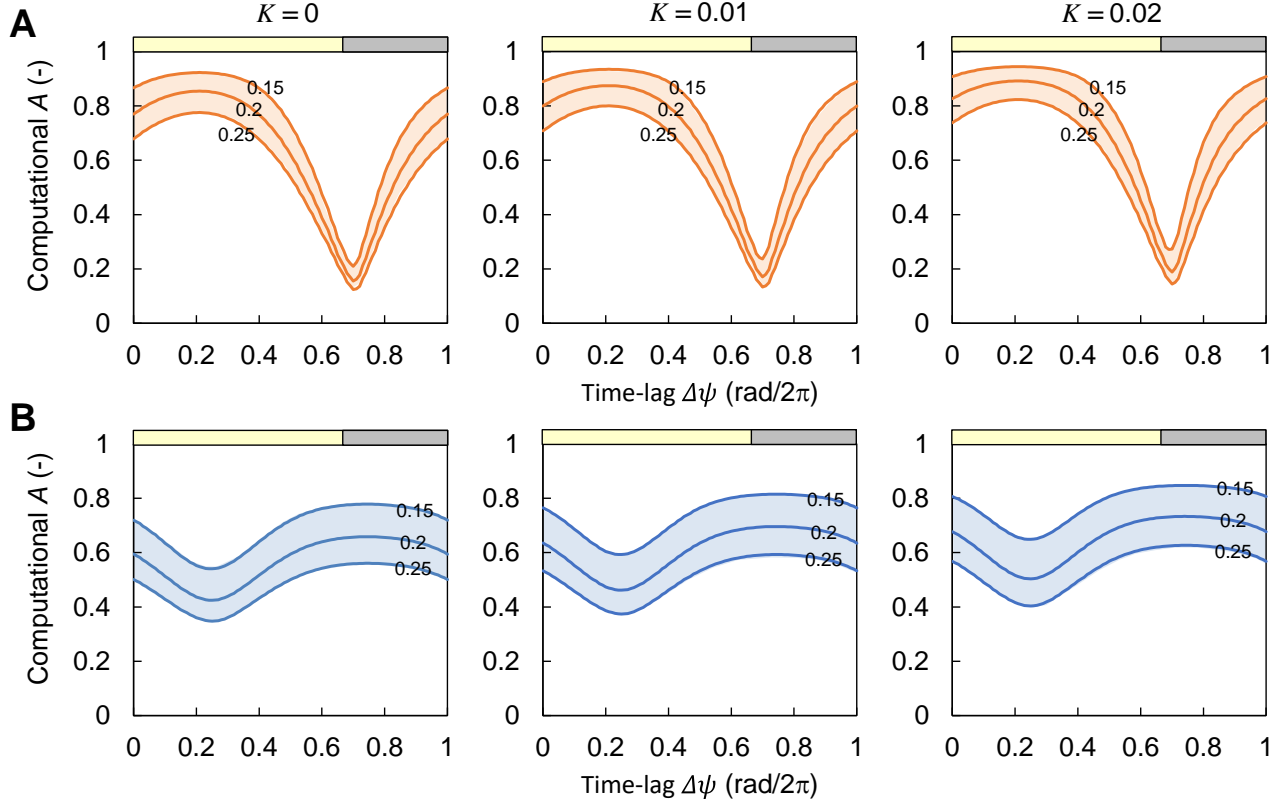

**Figure S2.** Computational amplitudes for different values of the coupling strength and distributions of the circadian frequency. **(A)** Computational amplitude for each time lag at  $K = 0.00, 0.01$ , and  $0.02$  under  $+10$  °C conditions. Each line indicates amplitude at  $\sigma_{\omega}/\omega_0 = 0.15, 0.20$ , or  $0.25$ . **(B)** Computational amplitude for each time lag at  $K = 0.00, 0.01$ , and  $0.02$  under  $-10$  °C conditions. Each line indicates an amplitude at  $\sigma_{\omega}/\omega_0 = 0.15, 0.20$ , or  $0.25$ .
